# Supplementary material for: Smc5/6 functions with Sgs1-Top3-Rmi1 to complete chromosome replication at natural pause sites
Source: Springer Nature journal article supplement (doi:10.1038/s41467-021-22217-w), 2021-04-08
Supplement: 41467_2021_22217_MOESM1_ESM.pdf [file 41467_2021_22217_MOESM1_ESM.pdf]

## **SUPPLEMENTARY INFORMATION**

### **Smc5/6 functions with Sgs1-Top3-Rmi1 to complete chromosome replication at natural pause sites**

**Sumedha Agashe, Chinnu Rose Joseph, Teresa Anne Clarisse Reyes, Demis Menolfi,  
Michele Giannattasio, Anja Waizenegger, Barnabas Szakal and  
Dana Branzei\***

\* Corresponding Author: Dana Branzei (dana.branzei@ifom.eu)

# Supplementary Figures and Figure Legends

## Supplementary Figure 1

Agashe et al

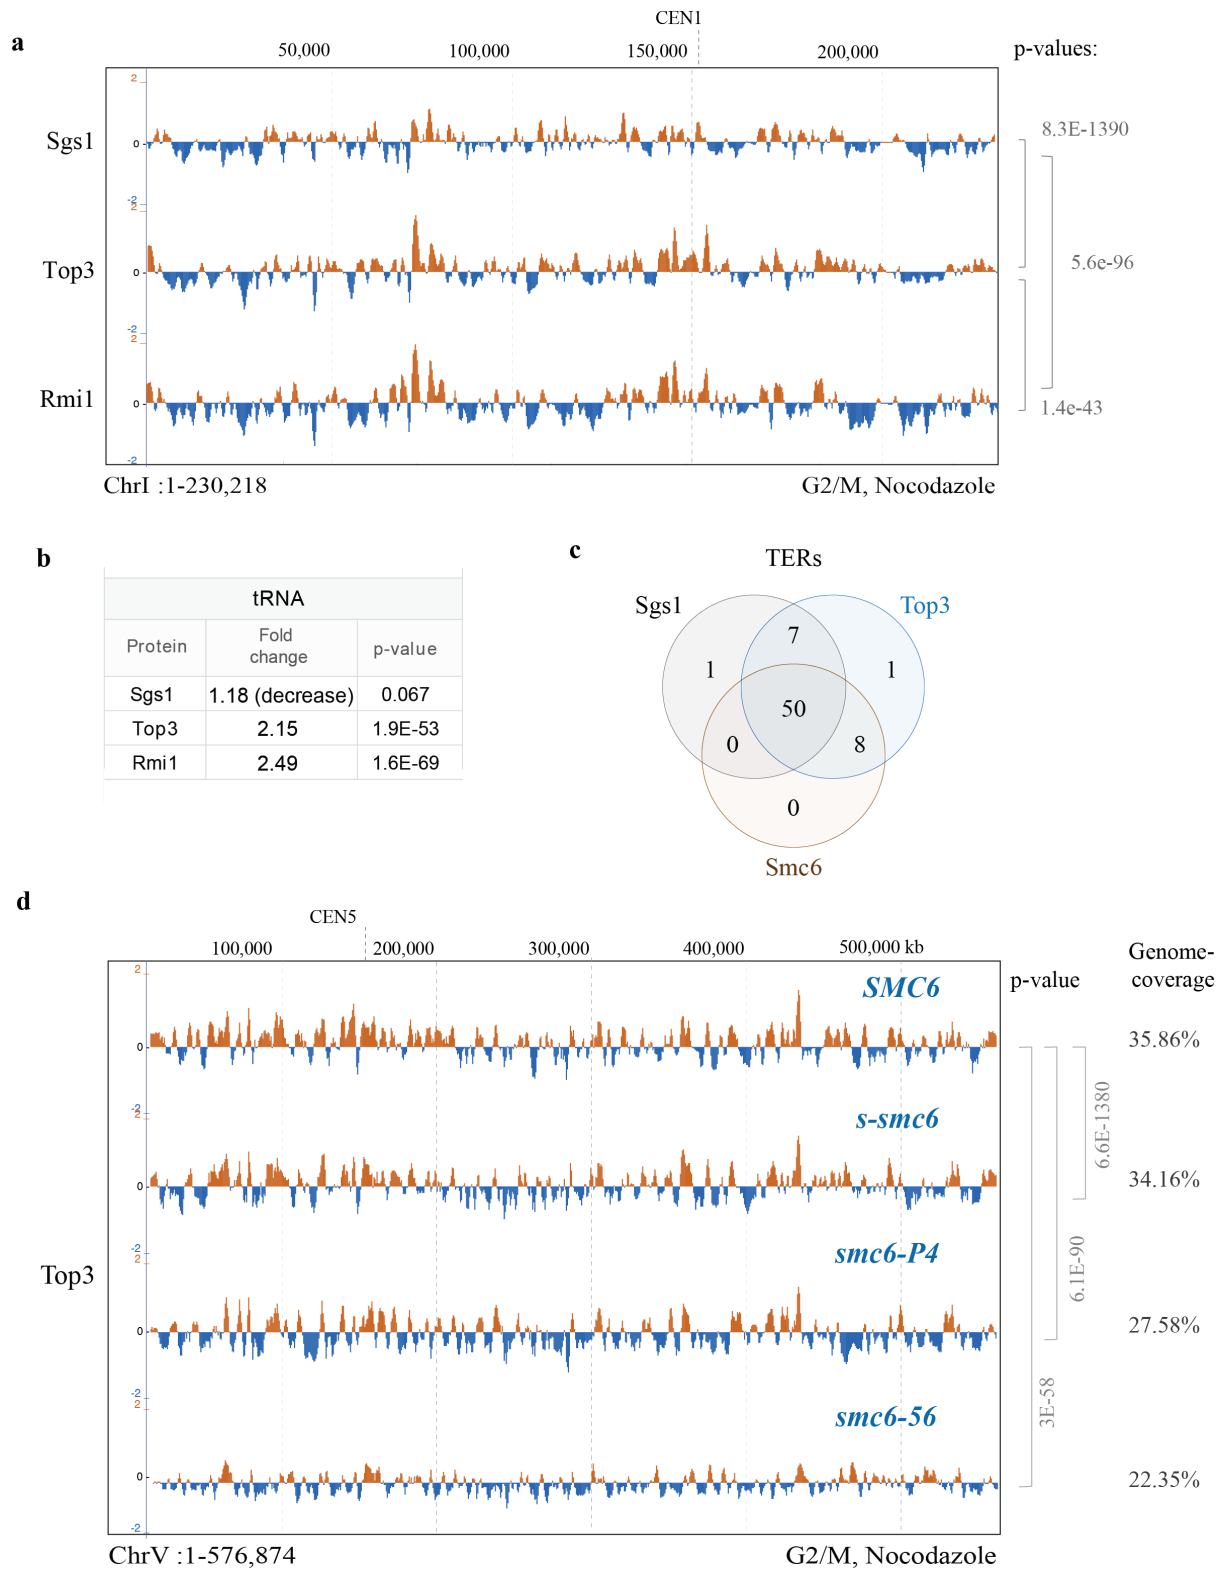

Supplementary Fig. 1. Top3 recruitment to chromatin is independent of Smc5/6, Related to Fig. 1. (a) ChIP-on-chip profile of HA-Sgs1, Top3-Flag, and Rmi1-Flag from G2/M-synchronized cells. Chr I is shown as example. The indicated p-values (one-tailed Fisher's exact test) relate to the genome-wide overlap between the considered protein clusters. Evaluation of the significance of overlap between the binding clusters of different proteins was performed by confrontation against a null hypothesis model generated with a Montecarlo-like simulation where the "score" for both the randomized positions and the actual data was calculated as the total number of overlapping bases among the whole clusters. The significance of correlation was scored using a one-tailed Fisher's exact test, as described in the Method section. (b) Analysis of overlap Sgs1, Top3 and Rmi1 at tRNAs genes. The table reports the fold increase/decrease of each protein at tRNA genes, calculated versus the ones expected for random binding, and the p-values (one-tailed Fisher's exact test) of the significance (see panel a). The values for Top3 and Rmi1 are also shown in Fig. 1b. (c) Smc6, Top3 and Sgs1 are enriched at NPSs that serve as termination sites (TERs) in G2/M. Values of overlap and non-overlap between the protein clusters are shown. (d) ChIP-on-chip profile of Top3-Flag from G2/M-synchronized WT, *s-smc6*, *smc6-P4* and *smc6-56* mutant cells. Chr V is shown as example. The indicated p-values (one-tailed Fisher's exact test) relate to the genome-wide overlap between the considered protein clusters (see legend of Fig. 1a for details). Genome-wide coverage in percentage of Top3 in different backgrounds is shown. Source data are provided as a Source Data file.

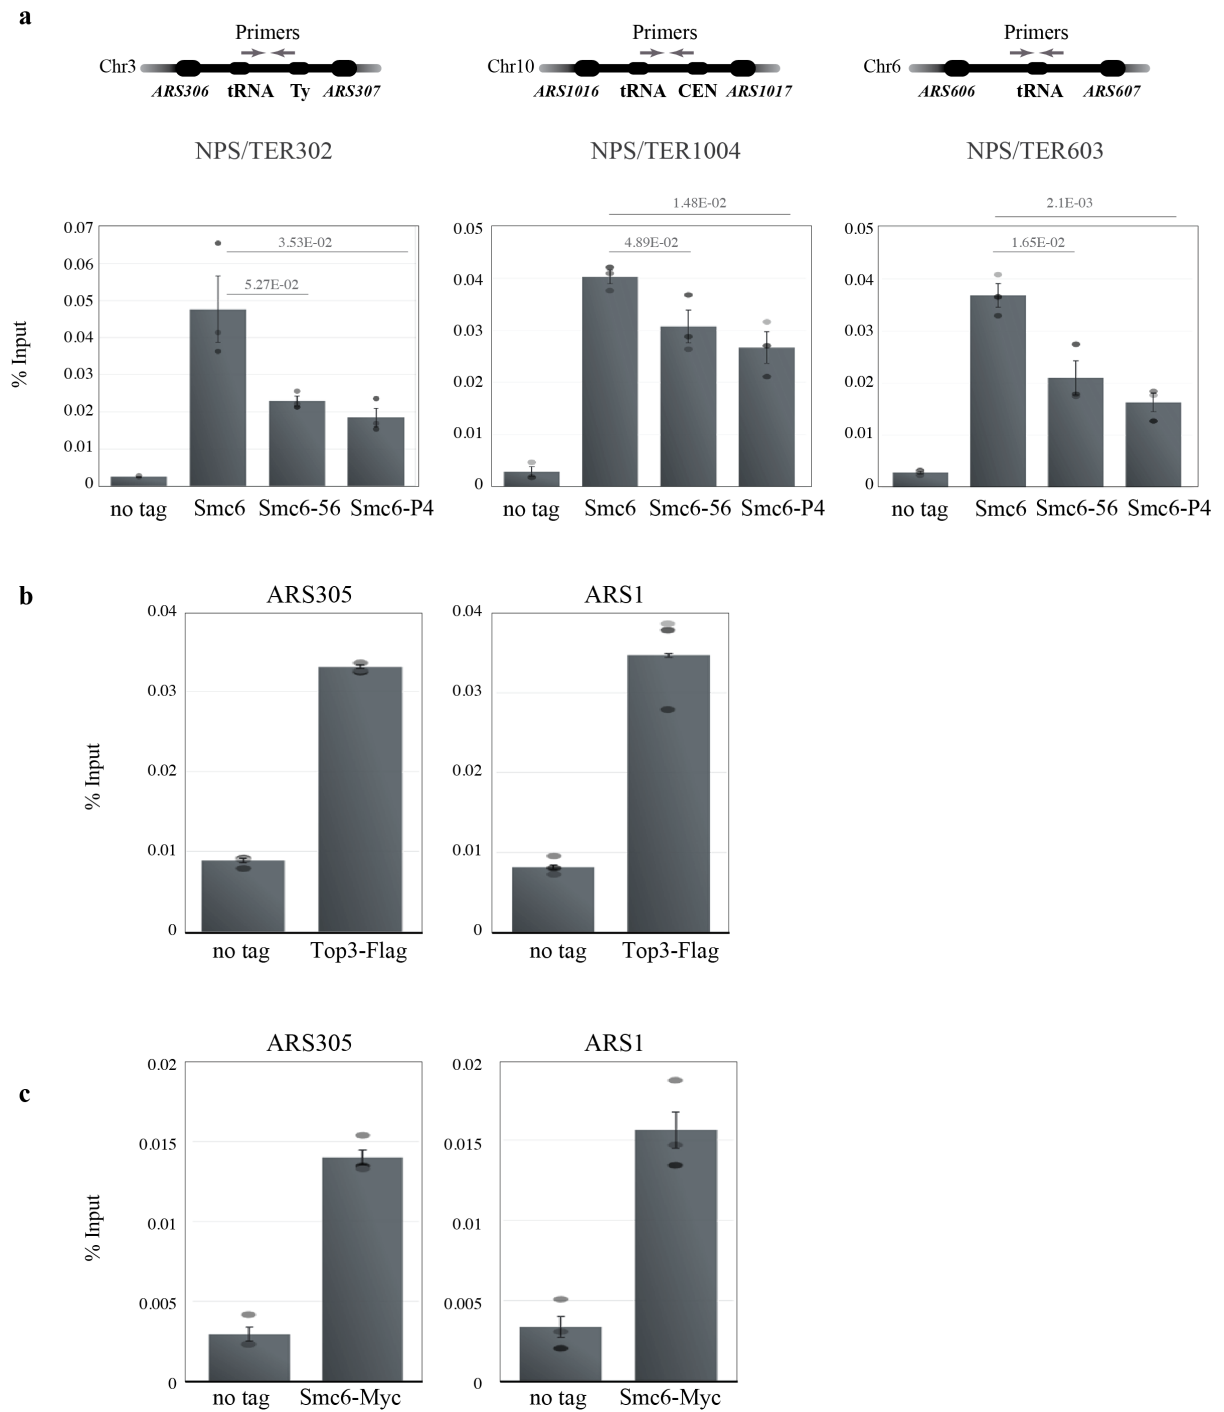

Supplementary Fig. 2. Smc5/6 and Top3 are recruited to natural pause sites and stalled replication forks, Related to Fig. 1. (a) ChIP-qPCR analysis of Myc-tagged Smc6 and variants versus no tag in G2/M phase at three indicated NPSs. (b, c) ChIP-qPCR analysis of Top3-Flag versus no tag (b) and Smc6-Myc versus no tag at stalled replication forks. Two early efficient

ARS regions (ARS305 and ARS1) were analyzed. (a-c) The mean of % input is derived from 3 biological replicates. Data are presented as mean values  $\pm$ SEM. p-values were calculated by unpaired two-sided t-test. Source data are provided as a Source Data file.

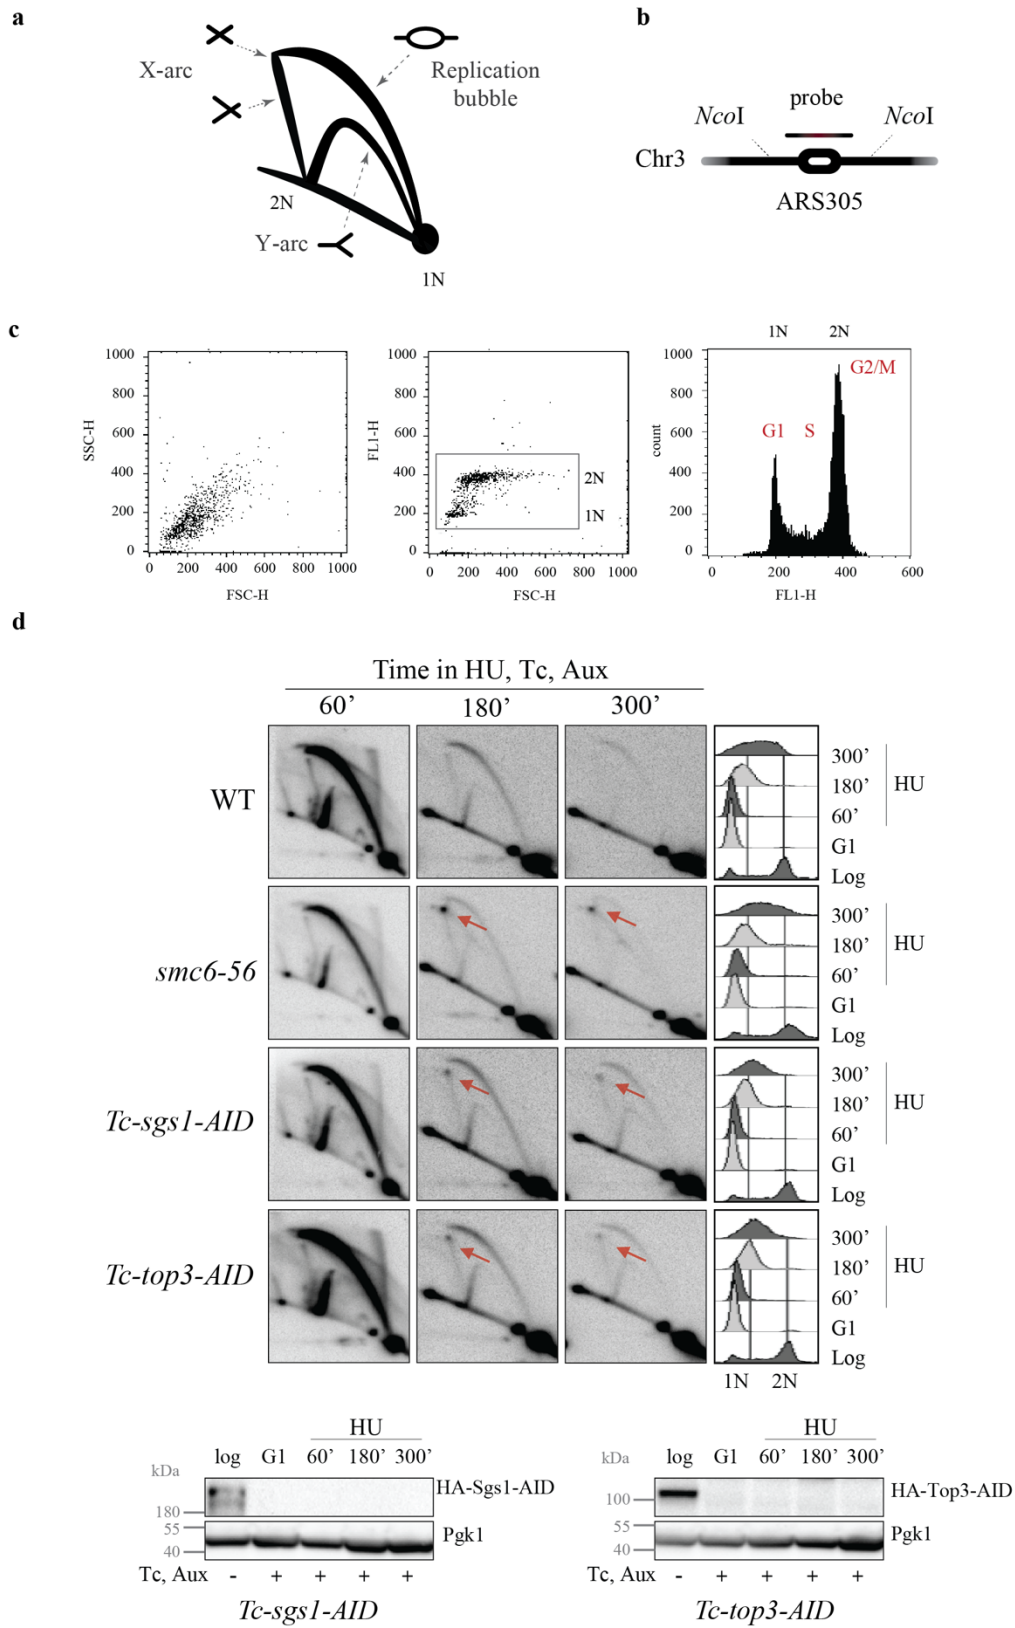

Supplementary Fig. 3. STR and Smc5/6 prevent joint molecule accumulation at stalled replication forks, Related to Fig. 2. (a) Schematic representation of replication intermediates observed by 2D gel electrophoresis at an early replication origin. (b) Schematic representation of the *ARS305* early replication origin analysed by 2D gel. (c) Flow Cytometry gating strategy and representative image. For all experiments in which cell cycle progression was followed, samples were gated on SSC-H and FSC-H as well as on FL1-H and FSC-H to exclude doublets and debris. Then a histogram of FL1-H values was generated from the remaining cells. A value of 200 in FL1-H represents the G1 population with a 1N DNA content and a value of 400 represents the G2 population with a 2N DNA content. 50.000 cells per sample were analysed. (d) Visualization of replication intermediates by 2D gel electrophoresis from cells of the indicated genotype at the *ARS305* region. The cells were synchronized in G1 phase and released in media containing 200 mM HU, as well as Tetracycline (Tc) and Auxin (Aux). The experiment was repeated independently twice with similar results. Flow cytometry profiles are indicated on the right. Cells were collected at the indicated time-points. Sgs1 and Top3 tagged with HA were depleted with Auxin and Tetracycline, and depletion was confirmed by Western blotting. Pgl1 was used as loading control. Joint Molecules accumulating on the X-arc are indicated by arrows. Source data are provided as a Source Data file.

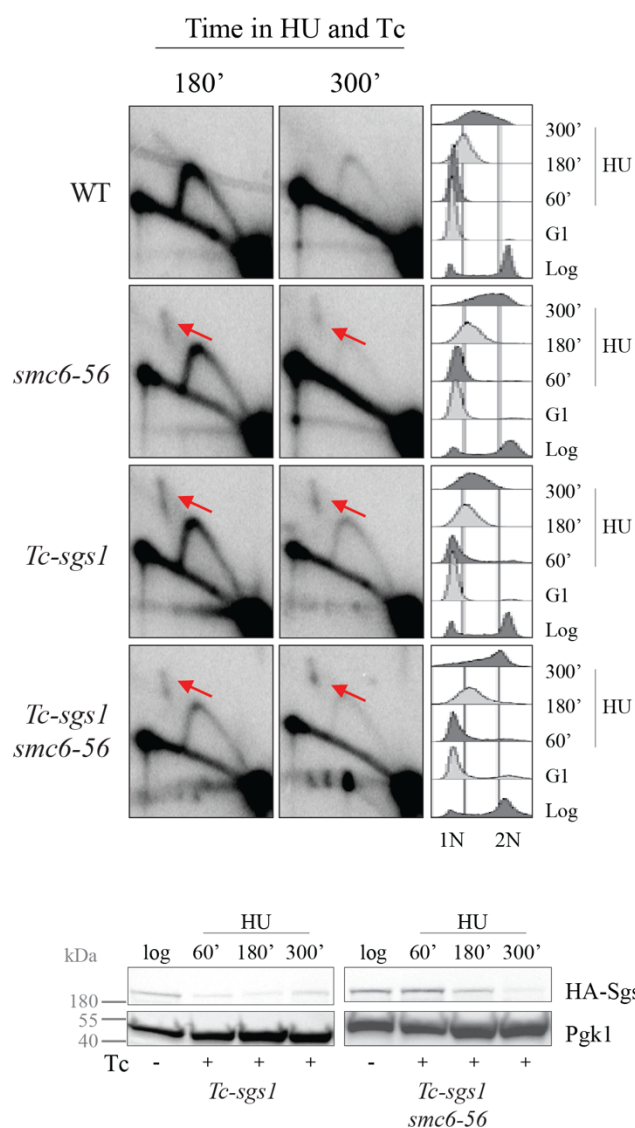

Supplementary Fig. 4. STR and Smc5/6 jointly prevent recombination intermediate accumulation at natural pause sites, Related to Fig. 2. (a, b) Visualization of replication intermediates arising at TER302 by 2D gel electrophoresis from cells of the indicated genotype synchronously released from G1 in media containing 200 mM HU, as well as Auxin (Aux) and Tetracycline (Tc). The experiment was repeated independently twice with similar results. FACS profiles indicated on the right show cell cycle progression. Sgs1 and Top3 tagged with



HA were depleted with Auxin and Tetracycline as indicated by WBs. Pgk1 was used as loading control. Joint molecules accumulating on the X-arc are indicated by arrows.

Source data are provided as a Source Data file.

Supplementary Figure 5

Agashe et al

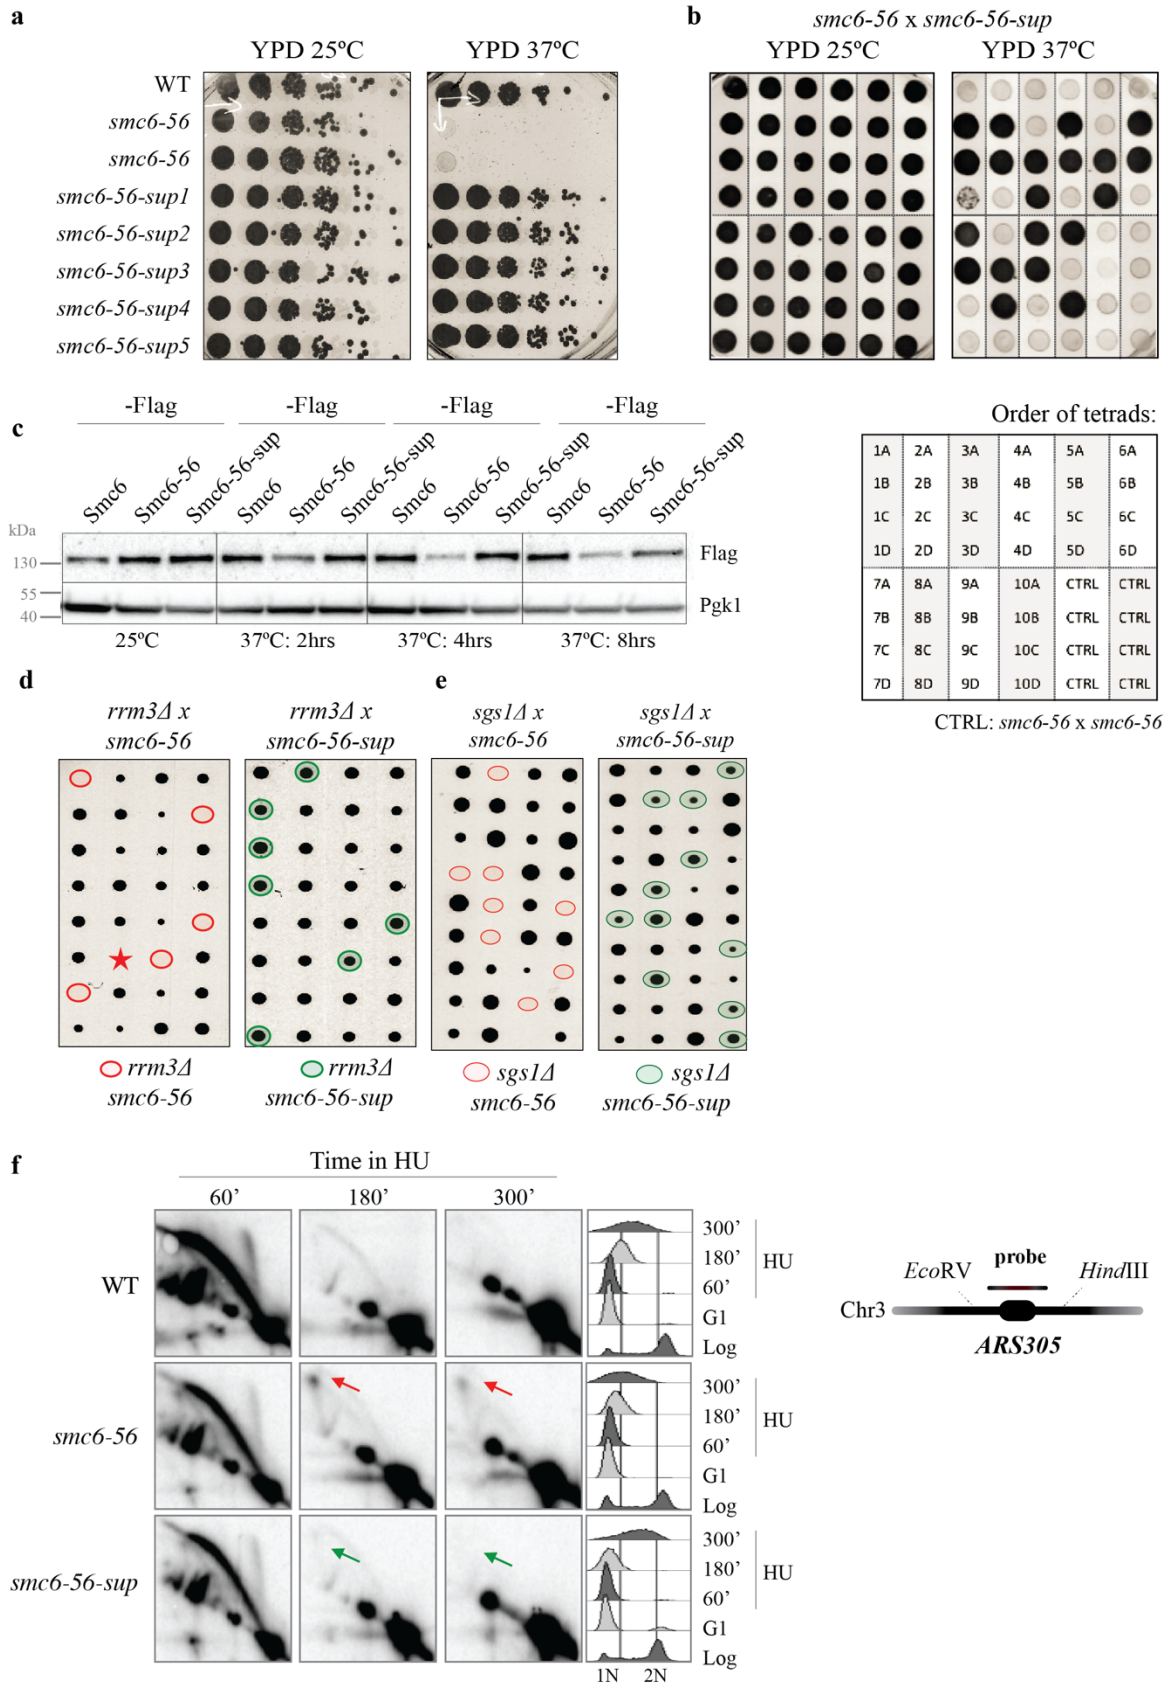

Supplementary Fig. 5. Validation and characterization of the *smc6-56* suppressor, Related to Fig. 4. (a) Rescue of the temperature sensitivity of *smc6-56* to WT level by suppressor mutation as observed by spot assay. (b) Validation of suppressor by checking 2:2 segregation of its temperature sensitivity when back-crossed with *smc6-56*, with separated tetrads spotted on the plates. (c) Smc6, Smc6-56 and Smc6-56-sup protein stability at 37°C as assessed by Western blot. Pgk1 stands for loading control. The experiment was repeated independently three times with similar results. (d, e) Genetic interactions between *smc6-56* or *smc6-56-sup* with *rrm3Δ* and *sgs1Δ* checked by crossing with indicated genotype, segregation and marking the genotypes of the spores. Note additional lethality in the *smc6-56* cross with *rrm3Δ* marked with a star. (f) 2D gel electrophoresis of replication intermediates forming at *ARS305* in WT, *smc6-56*, *smc6-56-sup* strains. The cells were synchronized in G1 phase and released in media containing 200 mM HU. Flow cytometry profiles on the right show cell cycle progression. Joint molecules accumulating on the X-arc are indicated by arrows. Source data are provided as a Source Data file.

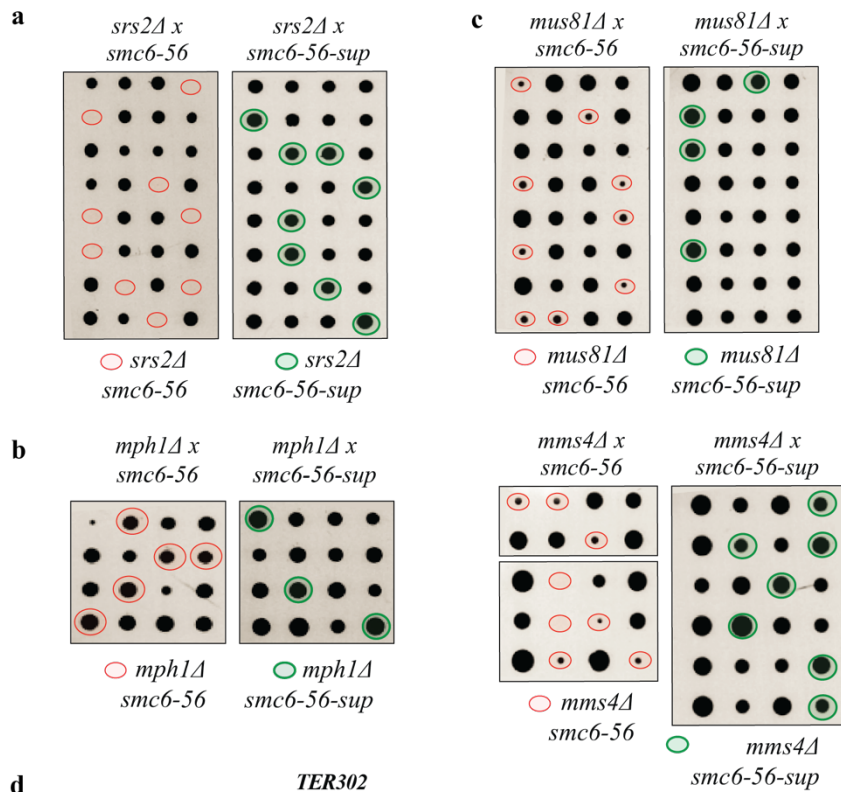

Supplementary Fig. 6. *smc6-56-sup* genetic interactions with mutations in DNA helicases and resolvases, Related to Fig. 5. (a, b, c) Genetic interactions between *smc6-56* or *smc6-56-sup* with *srs2Δ*, *mph1Δ*, *mus81Δ* and *mms4Δ* as checked by crossing. (d) Visualization of replication intermediates forming proximal to *TER302* by 2D gel electrophoresis from cells of the indicated genotype, synchronized in G1 and released in media containing 200 mM HU and Tetracycline (Tc). The experiment was repeated independently twice with similar results. Flow cytometry profiles are shown on the right. Sgs1, tagged with HA, was depleted with Tetracycline as verified by Western blotting. Pgk1 was used as loading control. Joint molecules (JMs) accumulating on the X-arc are indicated by arrows. Source data are provided as a Source Data file.

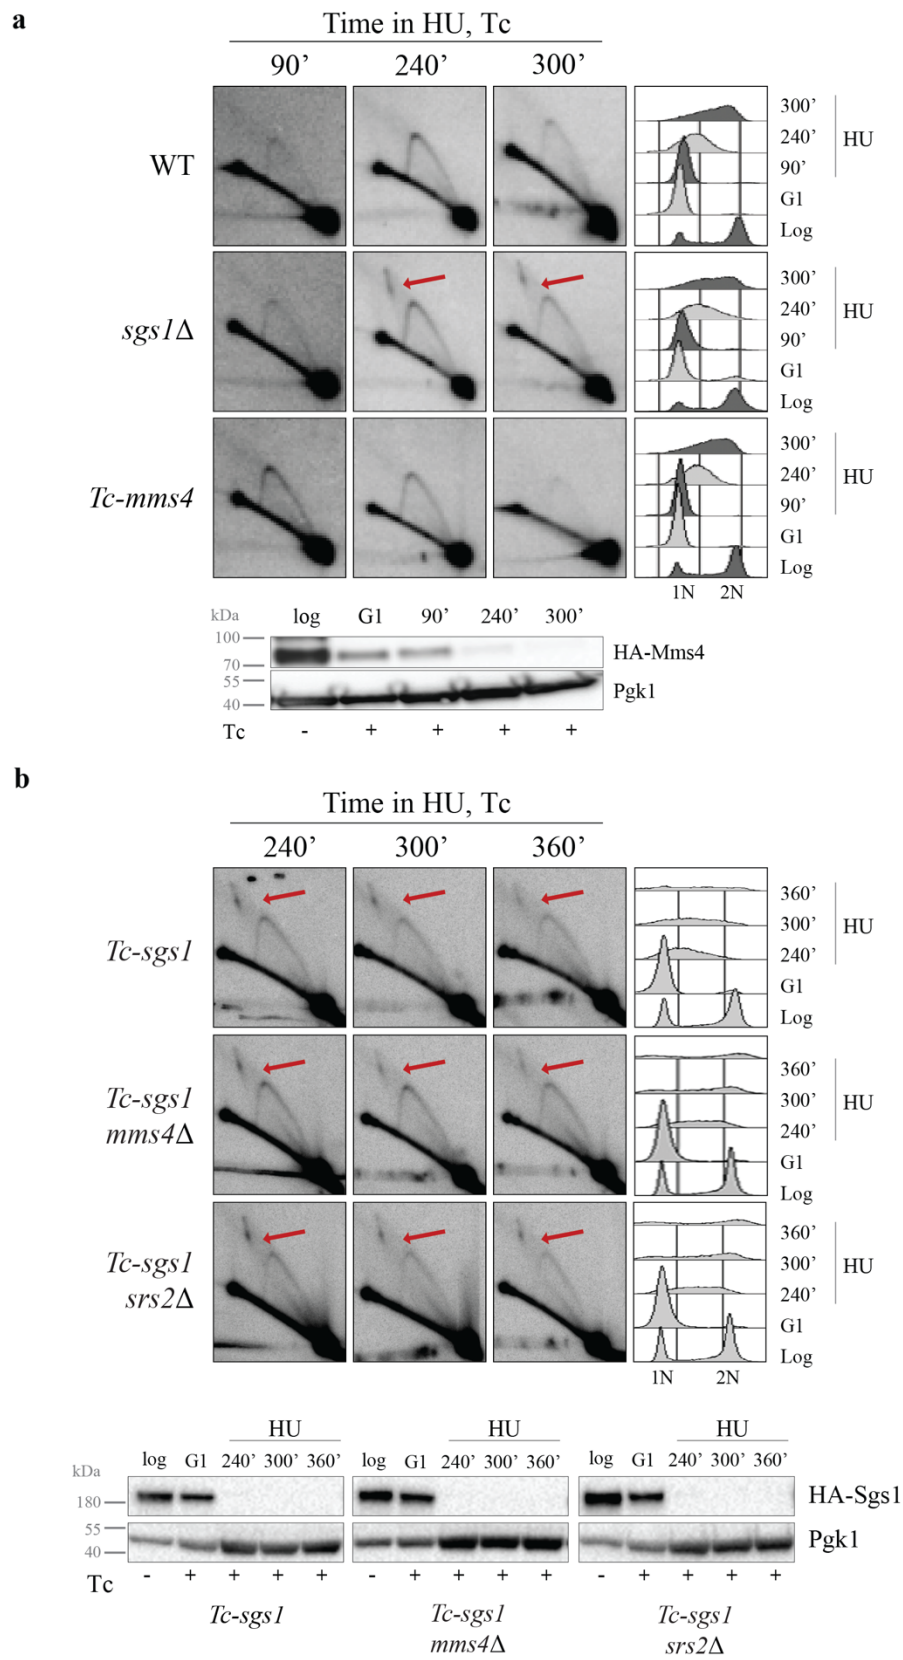

Supplementary Fig. 7. Mus81-Mms4 and Srs2 mutations do not increase joint molecules at natural pause sites, Related to Fig. 7. (a, b) Visualization of replication intermediates forming proximal to *TER302* by 2D gel electrophoresis from cells of the indicated genotype, synchronized in G1 and released in media containing 200 mM HU (a) or 150 mM HU (b) and Tetracycline (Tc). The experiments were repeated independently twice with similar results. Flow cytometry profiles are shown on the right. Mms4 and Sgs1 tagged with HA, were depleted with Tetracycline as verified by Western blotting. Pgk1 was used as loading control. Source data are provided as a Source Data file.

## Supplemental Items

Supplementary Table 1. *Saccharomyces cerevisiae* Strains Used in This Study.

| Strain name | genotype                                                                                        | Source         |
|-------------|-------------------------------------------------------------------------------------------------|----------------|
| FY1296      | <i>Mat A ade2-1 trp1-1 leu2-3 112 his3-11 15 ura3 can1-100 Rad5+ (W303)</i>                     | Lab collection |
| FY1646      | <i>Mat alpha ade2-1 trp1-1 leu2-3 112 his3-11 15 ura3 can1-100 Rad5+ (W303)</i>                 | Lab collection |
| FY1332      | <i>W303 Mat A smc6-P4-13MYC::KANMX4</i>                                                         | Lab collection |
| FY1432      | <i>W303 Mat A smc6-56-13MYC::KANMX4</i>                                                         | Lab collection |
| HY1729      | <i>W303 Mat alpha mms4Δ::HPHMX4</i>                                                             | Lab collection |
| FY1744      | <i>W303 Mat A sgs1-sim::KANMX</i>                                                               | Lab collection |
| FY1746      | <i>W303 Mat A sgs1-K621R::KANMX</i>                                                             | Lab collection |
| FY1060      | <i>W303 Mat A sgs1Δ::HIS3MX6</i>                                                                | Lab collection |
| HY2806      | <i>W303 Mat A SMC6-6HIS-3FLAG::KANMX4</i>                                                       | Lab collection |
| HY3167      | <i>W303 Mat A S::NATNT2-SMC6</i>                                                                | Lab collection |
| HY3293      | <i>W303 Mat A pADHI-tc3-3xHA-Top3::NATMX4</i>                                                   | Lab collection |
| HY3611      | <i>W303 Mat A rmi1Δ::KANMX4</i>                                                                 | Lab collection |
| HY3674      | <i>W303 Mat A ura3-1::ADHI-OsTIR1-9MYC(URA3) top3::pADHI-tc3-3xHA-Top3(HPHMX4)-AID::NATMX4</i>  | Lab collection |
| HY3707      | <i>W303 MATa RAD5+, sgs1::pADHI-tc3-6xHA-Sgs1 (KanMX4)</i>                                      | Lab collection |
| HY3721      | <i>W303 Mat A ura3-1::ADHI-OsTIR1-9Myc(URA3), sgs1::pADHI-tc3-3xHA(HPHMX4)-Sgs1-aid(KANMX4)</i> | Lab collection |
| HY3807      | <i>W303 Mat A TOP3-6HIS-10FLAG::KANMX4</i>                                                      | Lab collection |
| HY3882      | <i>W303 Mat A sgs1::pADHI-tc3-3xHA-Sgs1 (NATMX)</i>                                             | Lab collection |
| HY4071      | <i>W303 Mat A rrm3Δ::HIS3MX6</i>                                                                | Lab collection |
| HY4898      | <i>W303 Mat A S::NATNT2-Mms21</i>                                                               | Lab collection |
| HY4916      | <i>W303 Mat A Rrm3-10FLAG::KANMX4</i>                                                           | Lab collection |
| HY4921      | <i>W303 Mat A sgs1::pADHI-tc3-3xHA-Sgs1 (NATMX) mms4Δ::HPHMX</i>                                | Lab collection |
| HY6606      | <i>W303 Mat A S::NATNT2-Mms21-PK9-HIS3MX6</i>                                                   | Lab collection |
| HY7390      | <i>W303 Mat A mms4::pADHI-tc3-3xHA-Mms4::HPHMX</i>                                              | Lab collection |
| HY7512      | <i>W303 Mat alpha MMS4-6HIS-3FLAG::KANMX4</i>                                                   | Lab collection |
| HY7717      | <i>W303 Mat A SMC6-13myc::TRP</i>                                                               | This study     |
| HY7937      | <i>W303 Mat A smc6-P4-13myc::KANMX TOP3-6HIS-10FLAG::KANMX4</i>                                 | This study     |
| HY8031      | <i>W303 Mat A S::NATNT2-SMC6 TOP3-6HIS-10FLAG::KANMX4</i>                                       | This study     |
| HY8032      | <i>W303 Mat A smc6-56-13myc::KANMX TOP3-6HIS-10FLAG::KANMX4</i>                                 | This study     |
| HY8112      | <i>W303 Mat A Rmi1-6HIS-10FLAG::KANMX4</i>                                                      | This study     |
| HY8288      | <i>W303 Mat A smc6-56-FLAG::KANMX4</i>                                                          | This study     |
| HY8455      | <i>W303 Mat alpha srs2Δ::HIS3MX6</i>                                                            | Lab collection |



|         |                                                                                                                          |                |
|---------|--------------------------------------------------------------------------------------------------------------------------|----------------|
| HY8767  | <i>W303 Mat alpha mph1Δ::HPHMX4</i>                                                                                      | Lab collection |
| HY8947  | <i>W303 Mat A pADH1-tc3-3xHA-Top3::NATMX4 S::NATNT2-SMC6</i>                                                             | This study     |
| HY9342  | <i>W303 Mat A sgs1-K621R::KANMX TOP3-6HIS-10FLAG::KANMX4</i>                                                             | This study     |
| HY9387  | <i>W303 Mat A Smc6-56-Sup-13MYC::KANMX4 TOP3-6HIS-10FLAG::KANMX4</i>                                                     | This study     |
| HY9390  | <i>W303 Mat A Smc6-56-Sup-13MYC::KANMX4</i>                                                                              | This study     |
| HY9410  | <i>W303 Mat A mms21-CH::HIS TOP3-6HIS-10FLAG::KANMX4</i>                                                                 | This study     |
| HY9864  | <i>W303 Mat alpha mus81Δ::NATMX4</i>                                                                                     | Lab collection |
| HY9883  | <i>W303 Mat A sgs1::pADH1-tc3-3xHA-Sgs1(NATMX) srs2Δ::HIS3MX6</i>                                                        | Lab collection |
| HY10146 | <i>W303 Mat A sgs1::pADH1-tc3-3xHA-Sgs1(HPHMX4) smc6-56-Sup-13MYC::KANMX4</i>                                            | This study     |
| HY10149 | <i>W303 Mat A sgs1::pADH1-tc3-3xHA-Sgs1(HPHMX4) smc6-56-13MYC::KANMX4</i>                                                | This study     |
| HY10448 | <i>W303 Mat A sgs1Δ::NATMX4 Smc6-56-Sup-13MYC::KANMX4</i>                                                                | This study     |
| HY10490 | <i>W303 Mat A mus81Δ::NATMX4 Smc6-56-13MYC::KANMX4</i>                                                                   | This study     |
| HY10491 | <i>W303 Mat A mus81Δ::NATMX4 Smc6-56-Sup-13MYC::KANMX4</i>                                                               | This study     |
| HY10492 | <i>W303 Mat A mms4Δ::HPHMX4 Smc6-56-13MYC::KANMX4</i>                                                                    | This study     |
| HY10493 | <i>W303 Mat A mms4Δ::HPHMX4 Smc6-56-Sup-13MYC::KANMX4</i>                                                                | This study     |
| HY10494 | <i>W303 Mat A mph1Δ::HPHMX4 Smc6-56-13MYC::KANMX4</i>                                                                    | This study     |
| HY10496 | <i>W303 Mat A mph1Δ::HPHMX4 Smc6-56-Sup-13MYC::KANMX4</i>                                                                | This study     |
| HY10498 | <i>W303 Mat A ura3-1::ADH1-OsTIR1-9MYC(URA3) top3::pADH1-tc3-3xHA-Top3(HPHMX4)-AID::NATMX4 Smc6-56-Sup-13MYC::KANMX4</i> | This study     |
| HY10501 | <i>W303 Mat A ura3-1::ADH1-OsTIR1-9MYC(URA3) top3::pADH1-tc3-3xHA-Top3(HPHMX4)-AID::NATMX4 Smc6-56-13MYC::KANMX4</i>     | This study     |
| HY10633 | <i>W303 Mat A srs2Δ::HIS3MX6 Smc6-56-Sup-13MYC::KANMX4</i>                                                               | This study     |
| HY10800 | <i>W303 Mat A mms4::pADH1-tc3-3xHA-Mms4-10FLAG(KANMX)::HPHMX</i>                                                         | Lab collection |
| HY10843 | <i>W303 Mat A smc6-56-sup-13myc::KANMX sgs1-sim::KANMX</i>                                                               | This study     |
| HY10845 | <i>W303 Mat A smc6-56-sup-13myc::KANMX sgs1-K621R::KANMX</i>                                                             | This study     |
| HY10984 | <i>W303 Mat alpha smc6-56-13myc::KANMX MMS4-6HIS-3FLAG::KANMX4</i>                                                       | This study     |
| HY10986 | <i>W303 Mat alpha smc6-56-sup-13myc::KANMX MMS4-6HIS-3FLAG::KANMX4</i>                                                   | This study     |
| HY11551 | <i>W303 Mat A smc6-P4-FLAG::KANMX4</i>                                                                                   | This study     |
| HY11575 | <i>W303 Mat A Smc6-56-Sup-13MYC::KANMX4 (de novo created)</i>                                                            | This study     |

Supplementary Table 2. List of oligos used for qPCR

| Oligo     | purpose                    | Sequence                        |
|-----------|----------------------------|---------------------------------|
| TER302CF  | q-PCR primer at<br>TER302  | 5'-GGGTAGACGAACTATA TACGCAAT-3' |
| TER302CR  | q-PCR primer at<br>TER302  | 5'-TGCCCTCCTCCTTGTCATA-3'       |
| TER603AF  | q-PCR primer at<br>TER603  | 5'-ATGGGGGTTGAACATTGTGT-3'      |
| TER603AR  | q-PCR primer at<br>TER603  | 5'-TCGCATATAAGCAAGTGGTTT-3'     |
| TER1004FF | q-PCR primer at<br>TER1004 | 5'-CCATCTTGTTGTCCATGTCC-3'      |
| TER1004FR | q-PCR primer at<br>TER1004 | 5'-CGCATGGGATTTTGCTATC-3'       |

Supplementary Table 3. List of oligos used for 2D gel probes

| Oligo    | purpose                                    | Sequence                                           |
|----------|--------------------------------------------|----------------------------------------------------|
| TER302Fw | amplification of<br>termination probe (2D) | 5'-GAAGGTTCAACATCAATTGATTG<br>ATTCTGCCGCCATGATC-3' |
| TER302Rv | amplification of<br>termination probe (2D) | 5'-GCTTCCCTAGAACCTTCTTATGTT<br>TTACATGCGCTGGGTA-3' |
| ARS305FW | amplification of<br>ARS305 probe           | 5'-GTTCCGAAACAGGACACTTAGC-3'                       |
| ARS305RV | amplification of<br>ARS305 probe           | 5'-ATCCAGGAGGGACTCAATGTAG-3'                       |
