# Supplementary material for: Smc5/6 functions with Sgs1-Top3-Rmi1 to complete chromosome replication at natural pause sites
Source: Springer Nature journal article supplement (doi:10.1038/s41467-021-22217-w), 2021-04-08
Supplement: 41467_2021_22217_MOESM3_ESM.pdf [file 41467_2021_22217_MOESM3_ESM.pdf]

## Reporting Summary

Nature Research wishes to improve the reproducibility of the work that we publish. This form provides structure for consistency and transparency in reporting. For further information on Nature Research policies, see our [Editorial Policies](#) and the [Editorial Policy Checklist](#).

### Statistics

For all statistical analyses, confirm that the following items are present in the figure legend, table legend, main text, or Methods section.

n/a Confirmed

- |                                     |                                     |                                                                                                                                                                                                                                                            |
|-------------------------------------|-------------------------------------|------------------------------------------------------------------------------------------------------------------------------------------------------------------------------------------------------------------------------------------------------------|
| <input type="checkbox"/>            | <input checked="" type="checkbox"/> | The exact sample size ( $n$ ) for each experimental group/condition, given as a discrete number and unit of measurement                                                                                                                                    |
| <input type="checkbox"/>            | <input checked="" type="checkbox"/> | A statement on whether measurements were taken from distinct samples or whether the same sample was measured repeatedly                                                                                                                                    |
| <input type="checkbox"/>            | <input checked="" type="checkbox"/> | The statistical test(s) used AND whether they are one- or two-sided<br><i>Only common tests should be described solely by name; describe more complex techniques in the Methods section.</i>                                                               |
| <input checked="" type="checkbox"/> | <input type="checkbox"/>            | A description of all covariates tested                                                                                                                                                                                                                     |
| <input type="checkbox"/>            | <input checked="" type="checkbox"/> | A description of any assumptions or corrections, such as tests of normality and adjustment for multiple comparisons                                                                                                                                        |
| <input type="checkbox"/>            | <input checked="" type="checkbox"/> | A full description of the statistical parameters including central tendency (e.g. means) or other basic estimates (e.g. regression coefficient) AND variation (e.g. standard deviation) or associated estimates of uncertainty (e.g. confidence intervals) |
| <input type="checkbox"/>            | <input checked="" type="checkbox"/> | For null hypothesis testing, the test statistic (e.g. $F$ , $t$ , $r$ ) with confidence intervals, effect sizes, degrees of freedom and $P$ value noted<br><i>Give <math>P</math> values as exact values whenever suitable.</i>                            |
| <input checked="" type="checkbox"/> | <input type="checkbox"/>            | For Bayesian analysis, information on the choice of priors and Markov chain Monte Carlo settings                                                                                                                                                           |
| <input checked="" type="checkbox"/> | <input type="checkbox"/>            | For hierarchical and complex designs, identification of the appropriate level for tests and full reporting of outcomes                                                                                                                                     |
| <input checked="" type="checkbox"/> | <input type="checkbox"/>            | Estimates of effect sizes (e.g. Cohen's $d$ , Pearson's $r$ ), indicating how they were calculated                                                                                                                                                         |

*Our web collection on [statistics for biologists](#) contains articles on many of the points above.*

### Software and code

Policy information about [availability of computer code](#)

Data collection  
 BIORAD Image Lab Version 5.2.1 for Western Blot acquisition  
 Amersham Typhoon Scanner software V1.0 for 2D gel acquisition  
 BD CellQuest Version 3.3 for FACS sample collection  
 Roche LightCycler 96 version 1.1.0.1320 for qPCR

Data analysis  
 BIORAD Image Lab Version 5.2.1 for quantification of Western Blots  
 ImageJ 1.50i for preparation of 2D gel pictures  
 BD CellQuest Version 3.3 for FACS analysis  
 Numbers version 10.3.5 (7029.5.5) for ChIP-qPCR analysis

For manuscripts utilizing custom algorithms or software that are central to the research but not yet described in published literature, software must be made available to editors and reviewers. We strongly encourage code deposition in a community repository (e.g. GitHub). See the Nature Research [guidelines for submitting code & software](#) for further information.

### Data

Policy information about [availability of data](#)

All manuscripts must include a [data availability statement](#). This statement should provide the following information, where applicable:

- Accession codes, unique identifiers, or web links for publicly available datasets
- A list of figures that have associated raw data
- A description of any restrictions on data availability

The authors declare that all data supporting the findings of this study are available within the paper and its supplementary information files. The source data

## Field-specific reporting

Please select the one below that is the best fit for your research. If you are not sure, read the appropriate sections before making your selection.

- Life sciences       Behavioural & social sciences       Ecological, evolutionary & environmental sciences

For a reference copy of the document with all sections, see [nature.com/documents/nr-reporting-summary-flat.pdf](https://www.nature.com/documents/nr-reporting-summary-flat.pdf)

## Life sciences study design

All studies must disclose on these points even when the disclosure is negative.

|                 |                                                                                                                                                                                                                                                                                                                                                                                                                                                                                                                                                                                                                                                                                                                                                             |
|-----------------|-------------------------------------------------------------------------------------------------------------------------------------------------------------------------------------------------------------------------------------------------------------------------------------------------------------------------------------------------------------------------------------------------------------------------------------------------------------------------------------------------------------------------------------------------------------------------------------------------------------------------------------------------------------------------------------------------------------------------------------------------------------|
| Sample size     | No statistical methods were used to predetermine sample size, as this study did not include animal models or human participants. Sample size was determined based on the gold standards in the field and experiments to obtain statistical significance and reproducibility. We used 2000 million cells for each 2D gel point, 20 000 cells for each flow cytometry analysis point, 10 million cells for each ChIP-on-chip sample, over 100 molecules for EM analysis).                                                                                                                                                                                                                                                                                     |
| Data exclusions | No data were excluded                                                                                                                                                                                                                                                                                                                                                                                                                                                                                                                                                                                                                                                                                                                                       |
| Replication     | All experimental findings were reliably reproduced as indicated in the figure legends. All experiments were repeated at least 2 times to ensure reproducibility. We have not experienced cases of non-reproducible data in this study. At least three biological replicates were included for ChIP-qPCR. The mean values of 3 experiments were calculated and shown with corresponding SEM. Statistical analyses were performed using a two-tailed unpaired t-test. 2D gel experiments were repeated at least 2 times and in some cases additionally different alleles, timepoints or regions were used to confirm the results. ChIP-on-chip experiments were repeated at least twice often with different components of the same complex for confirmation. |
| Randomization   | No randomization was done because this study did not involve animals or human participants. Samples were organized into groups based on treatment and genotype. Appropriate controls were included in all experiments.                                                                                                                                                                                                                                                                                                                                                                                                                                                                                                                                      |
| Blinding        | Before each experiment, the yeast strains that were used were given numbers instead of the genotype or condition and the numbers were then connected to the strains only after analysis.                                                                                                                                                                                                                                                                                                                                                                                                                                                                                                                                                                    |

## Reporting for specific materials, systems and methods

We require information from authors about some types of materials, experimental systems and methods used in many studies. Here, indicate whether each material, system or method listed is relevant to your study. If you are not sure if a list item applies to your research, read the appropriate section before selecting a response.

### Materials & experimental systems

| n/a                                 | Involved in the study                                     |
|-------------------------------------|-----------------------------------------------------------|
| <input type="checkbox"/>            | <input checked="" type="checkbox"/> Antibodies            |
| <input type="checkbox"/>            | <input checked="" type="checkbox"/> Eukaryotic cell lines |
| <input checked="" type="checkbox"/> | <input type="checkbox"/> Palaeontology and archaeology    |
| <input checked="" type="checkbox"/> | <input type="checkbox"/> Animals and other organisms      |
| <input checked="" type="checkbox"/> | <input type="checkbox"/> Human research participants      |
| <input checked="" type="checkbox"/> | <input type="checkbox"/> Clinical data                    |
| <input checked="" type="checkbox"/> | <input type="checkbox"/> Dual use research of concern     |

### Methods

| n/a                                 | Involved in the study                              |
|-------------------------------------|----------------------------------------------------|
| <input type="checkbox"/>            | <input checked="" type="checkbox"/> ChIP-seq       |
| <input type="checkbox"/>            | <input checked="" type="checkbox"/> Flow cytometry |
| <input checked="" type="checkbox"/> | <input type="checkbox"/> MRI-based neuroimaging    |

## Antibodies

|                 |                                                                                                                                                                                                                                                                                                                                                                                                                                                                                                                                                                                                                                        |
|-----------------|----------------------------------------------------------------------------------------------------------------------------------------------------------------------------------------------------------------------------------------------------------------------------------------------------------------------------------------------------------------------------------------------------------------------------------------------------------------------------------------------------------------------------------------------------------------------------------------------------------------------------------------|
| Antibodies used | anti-FLAG (mouse monoclonal, clone M2, Sigma; cat. no: F3165) used for ChIP, used in Western Blot 1:5000<br>anti-HA (mouse monoclonal, clone 16B12, Biolegend; cat. no: 901501) used in Western Blot 1:3000<br>anti-HA (mouse monoclonal, clone F-7, Santa Cruz Biotechnology cat. no: sc-7392), used for ChIP<br>anti-Pgk1 (mouse monoclonal, clone 22C5D8, Novex Life Technologies; cat. no: 459250) used in Western Blot 1:5000<br>anti-myc (mouse monoclonal, clone 9E10, Santa Cruz Biotechnology cat. no: sc-40), used for ChIP<br>anti-mouse IgG HRP-linked (goat, Cell Signaling; cat. no. 7076) used in Western Blot 1:20.000 |
| Validation      | All antibodies in this study were used for Western Blot analysis in <i>S. cerevisiae</i> yeast samples and the bands for the respective proteins corresponded with the expected size. The application (Western Blot) and species ( <i>S. cerevisiae</i> ) were indicated on the manufacturers websites.<br>We have validated anti-FLAG, anti-HA and anti-MYC antibodies in Western Blot by using an <i>S. cerevisiae</i> yeast strain without any tag to confirm specificity. The Pgk1 antibody is commonly used as a loading control in many publications (Gay et. al., 2018).                                                        |

## Eukaryotic cell lines

Policy information about [cell lines](#)

|                                                                      |                                                                                                         |
|----------------------------------------------------------------------|---------------------------------------------------------------------------------------------------------|
| Cell line source(s)                                                  | Yeast W303                                                                                              |
| Authentication                                                       | The strains were confirmed with resistant markers, PCR, sequencing, western blotting wherever relevant. |
| Mycoplasma contamination                                             | NA                                                                                                      |
| Commonly misidentified lines<br>(See <a href="#">ICLAC</a> register) | NA                                                                                                      |

## ChIP-seq

### Data deposition

- Confirm that both raw and final processed data have been deposited in a public database such as [GEO](#).
- Confirm that you have deposited or provided access to graph files (e.g. BED files) for the called peaks.

|                                                                    |                                                                                                                                                                                                                                                                                                                                                                                                                                                                                                                                                                                                                                                                                                    |
|--------------------------------------------------------------------|----------------------------------------------------------------------------------------------------------------------------------------------------------------------------------------------------------------------------------------------------------------------------------------------------------------------------------------------------------------------------------------------------------------------------------------------------------------------------------------------------------------------------------------------------------------------------------------------------------------------------------------------------------------------------------------------------|
| Data access links<br><i>May remain private before publication.</i> | GSE147452                                                                                                                                                                                                                                                                                                                                                                                                                                                                                                                                                                                                                                                                                          |
| Files in database submission                                       | GSM4431187 Top3-Flag input<br>GSM4431188 Top3-Flag<br>GSM4431189 Smc6-Flag input<br>GSM4431190 Smc6-Flag<br>GSM4431191 Rrm3-Flag input<br>GSM4431192 Rrm3-Flag<br>GSM4431197 Rmi1-Flag input<br>GSM4431198 Rmi1-Flag<br>GSM4431199 S-Smc6 Top3-Flag input<br>GSM4431200 S-Smc6 Top3-Flag<br>GSM4431203 Smc6-P4 Top3-Flag input<br>GSM4431204 Smc6-P4 Top3-Flag<br>GSM4971513 6HA-Sgs1<br>GSM4971514 6HA-Sgs1 input<br>GSM4971515 HA-Mms4<br>GSM4971516 HA-Mms4 input<br>GSM4971517 Top3-Flag replicate input<br>GSM4971518 Top3-Flag replicate<br>GSM4971519 smc6-56 Top3-Flag input<br>GSM4971520 smc6-56 Top3-Flag<br>GSM4971521 smc6-56-sup Top3-Flag input<br>GSM4971522 smc6-56-sup Top3-Flag |
| Genome browser session<br>(e.g. <a href="#">UCSC</a> )             | no longer applicable                                                                                                                                                                                                                                                                                                                                                                                                                                                                                                                                                                                                                                                                               |

### Methodology

|                         |                                                                                                                                                                                                                                                                                                                                                                                                                                                                                                                                                                                                                                                                                                                                                                                                                                                                                                                                                                                                                                                    |
|-------------------------|----------------------------------------------------------------------------------------------------------------------------------------------------------------------------------------------------------------------------------------------------------------------------------------------------------------------------------------------------------------------------------------------------------------------------------------------------------------------------------------------------------------------------------------------------------------------------------------------------------------------------------------------------------------------------------------------------------------------------------------------------------------------------------------------------------------------------------------------------------------------------------------------------------------------------------------------------------------------------------------------------------------------------------------------------|
| Replicates              | Two biological replicates                                                                                                                                                                                                                                                                                                                                                                                                                                                                                                                                                                                                                                                                                                                                                                                                                                                                                                                                                                                                                          |
| Sequencing depth        | NA, labelled probes were hybridized to Affymetrix <i>S.cerevisiae</i> Tiling 1.0 (P/N 900645) arrays and processed with TAS software.                                                                                                                                                                                                                                                                                                                                                                                                                                                                                                                                                                                                                                                                                                                                                                                                                                                                                                              |
| Antibodies              | anti-FLAG (mouse monoclonal, clone M2, Sigma; cat. no: F3165) used for ChIP<br>anti-HA (mouse monoclonal, clone F-7, Santa Cruz Biotechnology cat. no: sc-7392), used for ChIP                                                                                                                                                                                                                                                                                                                                                                                                                                                                                                                                                                                                                                                                                                                                                                                                                                                                     |
| Peak calling parameters | Data from all the experiments were analyzed using a modified version of the Tiling Array Suite software (TAS) from Affymetrix. TAS produces per each probe position the Signal and the Change pValue taking in count the probes localized within a given bandwidth around the inspected probe. The program relies on the underlying statistical model (Wilcoxon signed rank test) and was used in differential analysis mode (IP vs INPUT chips) and to perform data normalization. The details of the analysis explained previously by Bermejo et al., 2009<br>Clusters from TAS data were identified as ranges within the chromosome respecting the following conditions: Estimated signal (IP/ INPUT binding ratio) positive in the whole range; Change P-value of the Wilcoxon signed rank test < 0.2 in the whole range, except for segments within the range shorter than 600 bp; Size of the region at least 600bp. The peak of each cluster has been defined as the genomic position within the cluster with the highest estimated signal. |
| Data quality            | Primary data analyses were carried out using the Affymetrix Tiling Array Suite Software (TAS) as described in the Supplemental Statistical Analysis document in Bermejo et al., 2009. TAS is usually used to assess quality of array data.                                                                                                                                                                                                                                                                                                                                                                                                                                                                                                                                                                                                                                                                                                                                                                                                         |

Software

Tiling Array Suite software (TAS) from Affymetrix, details of the code as in Bermejo et al., 2009

## Flow Cytometry

### Plots

Confirm that:

- The axis labels state the marker and fluorochrome used (e.g. CD4-FITC).
- The axis scales are clearly visible. Include numbers along axes only for bottom left plot of group (a 'group' is an analysis of identical markers).
- All plots are contour plots with outliers or pseudocolor plots.
- A numerical value for number of cells or percentage (with statistics) is provided.

### Methodology

Sample preparation

For flow cytometry analysis, approximately  $1 \times 10^7$  cells for each timepoint were collected and fixed in 70% ethanol. Cells were suspended in 10 mM Tris pH 7.5 buffer, and RNA and proteins were removed by RNaseA (0.4 mg/ml) and proteinase K (1 mg/ml) treatment. Subsequently, cells were stained in SYTOX green solution (1  $\mu$ M) and analyzed using a FACSCalibur Flow Cytometer.

Instrument

BD FACSCalibur Flow Cytometer

Software

BD CellQuest Version 3.3

Cell population abundance

No populations were sorted, only cell cycle progression was followed by analyzing 20.000 cells per sample

Gating strategy

Samples were gated on SSC-H and FSC-H as well as on FL1-H and FSC-H to exclude doublets and debris. Then a histogram of FL1-H values was generated from the remaining cells. A value of 200 in FL1-H represents the G1 population with a 1N DNA content and a value of 400 represents the G2 population with a 2N DNA content.

- Tick this box to confirm that a figure exemplifying the gating strategy is provided in the Supplementary Information.
